# Supplementary material for: Hazelnut Skin in Ewes’ Diet: Effects on Colostrum Immunoglobulin G and Passive Transfer of Immunity to the Lambs
Source: MDPI journal article supplement (doi:10.3390/ani12223220), 2022-11-21
Supplement: s1 [file s1]

**Table S2.** IgG concentration (g/l) in sheep and lamb's blood serum and colostrum during the whole sampling period. Data are expressed as mean  $\pm$  SD among the time (A = at birth, B = 24h after birth, C = 48h after birth, D = 10 days after birth).

| Sample    | Group<br>(n = 8) <sup>1</sup> | Sampling time   |                 |                |                |
|-----------|-------------------------------|-----------------|-----------------|----------------|----------------|
|           |                               | A               | B               | C              | D              |
| Sheep     | CTR                           | 16.5 $\pm$ 3.2  | 18.1 $\pm$ 4.4  | 17.1 $\pm$ 3.5 | n.d.           |
|           | HZN                           | 16.0 $\pm$ 1.6  | 16.4 $\pm$ 1.7  | 15.9 $\pm$ 2.1 | n.d.           |
| Colostrum | CTR                           | 60.4 $\pm$ 10.7 | 19.1 $\pm$ 10.4 | 6.6 $\pm$ 4.4  | n.d.           |
|           | HZN                           | 93.7 $\pm$ 35.9 | 27.6 $\pm$ 13.6 | 4.8 $\pm$ 2.4  | n.d.           |
| Lambs     | CTR                           | 5.2 $\pm$ 1.5   | 22.8 $\pm$ 6.9  | 18.2 $\pm$ 6.0 | 14.7 $\pm$ 3.8 |
|           | HZN                           | 4.0 $\pm$ 1.2   | 27.3 $\pm$ 3.0  | 22.7 $\pm$ 3.6 | 17.0 $\pm$ 3.2 |

\* CTR = control group; HZN = hazelnut skin group; A = at birth; B = 24h after birth; C = 48h after birth; D = 10 days after birth; n.d. = not determined

<sup>1</sup> Total number of samples for sheep and colostrum equal to 48 (8 ewes  $\times$  2 groups  $\times$  3 sampling dates); total number of samples for lambs equal to 64 (8 lambs  $\times$  2 groups  $\times$  4 sampling dates).
