# Supplementary material for: Hazelnut Skin in Ewes’ Diet: Effects on Colostrum Immunoglobulin G and Passive Transfer of Immunity to the Lambs
Source: MDPI journal article supplement (doi:10.3390/ani12223220), 2022-11-21
Supplement: s1 [file s1]

**Table S1.** Proximate composition and fatty acid profile of experimental feedstuffs.

|                                                          | Hay  | Barley | Maize | Soybean meal | Rumen protected fat | Hazelnut skin |
|----------------------------------------------------------|------|--------|-------|--------------|---------------------|---------------|
| Proximate composition (g/kg DM, unless otherwise stated) |      |        |       |              |                     |               |
| DM (g/kg)                                                | 889  | 881    | 880   | 900          | 980                 | 916           |
| Ash                                                      | 83   | 25     | 15    | 67           | 143                 | 25            |
| CP                                                       | 89   | 128    | 103   | 482          | -                   | 112           |
| RDP (% CP)                                               | 66.8 | 80.0   | 35.1  | 72.0         | -                   | 8.0           |
| EE                                                       | 15   | 21     | 42    | 12           | 857                 | 327           |
| NDF                                                      | 702  | 218    | 101   | 158          | -                   | 501           |
| ADF                                                      | 413  | 85     | 36    | 106          | -                   | 422           |
| ADL                                                      | 63   | 16     | 10    | 78           | -                   | 245           |
| NSC <sup>1</sup>                                         | 111  | 608    | 739   | 281          | -                   | 35            |
| NE <sub>L</sub> (MJ/kg DM)                               | 4.8  | 8.1    | 8.9   | 8.2          | 19.6                | 8.8           |
| Fatty acid (g/kg DM)                                     |      |        |       |              |                     |               |
| C10:0                                                    | 0.45 | 0.45   | 0.39  | 0.72         | 0.41                | n.d.          |
| C12:0                                                    | n.d. | n.d.   | n.d.  | n.d.         | 3.17                | 0.07          |
| C14:0                                                    | 0.09 | 0.09   | 0.02  | 0.02         | 7.79                | 0.14          |
| C15:0 <sup>2</sup>                                       | 0.06 | 0.03   | 0.01  | 0.02         | 0.19                | 0.03          |
| C16:0                                                    | 1.85 | 6.15   | 5.42  | 3.60         | 284.56              | 13.86         |
| C16:1 <i>t</i> 3                                         | 0.09 | n.d.   | n.d.  | n.d.         | n.d.                | n.d.          |
| C17:0 <i>aiiso</i>                                       | 0.01 | n.d.   | n.d.  | n.d.         | 0.14                | 0.07          |
| C16:1 <i>c</i> 9                                         | 0.03 | 0.03   | 0.05  | 0.02         | 0.98                | 0.39          |
| C17:1 <i>c</i> 9                                         | 0.01 | 0.01   | 0.02  | 0.01         | 0.25                | 0.14          |
| C18:0                                                    | 0.28 | 0.55   | 0.91  | 1.01         | 25.44               | 4.42          |
| C18:1 <i>t</i>                                           | 0.01 | 0.01   | 0.02  | 0.01         | 1.89                | n.d.          |
| C18:1 <i>c</i> 9                                         | 0.45 | 3.68   | 11.30 | 2.47         | 225.80              | 189.90        |
| C18:1 <i>c</i> 11                                        | 0.04 | 0.17   | 0.28  | 0.31         | n.d.                | 3.58          |
| C18:2 <i>c</i> 9 <i>c</i> 12                             | 1.42 | 14.64  | 23.53 | 11.65        | 49.61               | 24.19         |
| C20:0                                                    | 0.09 | 0.06   | 0.14  | 0.04         | 1.98                | 0.26          |
| C18:3 <i>c</i> 6 <i>c</i> 9 <i>c</i> 12                  | 0.02 | 0.01   | 0.01  | 0.01         | 0.11                | n.d.          |
| C20:1 <i>c</i> 9                                         | 0.01 | 0.16   | 0.09  | 0.02         | 0.78                | 0.31          |
| C18:3 <i>c</i> 9 <i>c</i> 12 <i>c</i> 15                 | 1.95 | 1.30   | 0.51  | 1.68         | 1.64                | 0.36          |
| C20:2 <i>n</i> 6                                         | n.d. | 0.02   | 0.01  | 0.01         | 0.02                | n.d.          |
| C22:0                                                    | 0.11 | 0.05   | 0.04  | 0.06         | 0.30                | 0.10          |
| C20:5 <i>n</i> 3                                         | 0.08 | 0.02   | 0.04  | 0.03         | 0.19                | n.d.          |
| Σ SFA                                                    | 2.97 | 7.36   | 6.93  | 5.47         | 323.99              | 18.95         |
| Σ MUFA                                                   | 0.66 | 4.07   | 11.76 | 2.84         | 229.71              | 194.32        |
| Σ PUFA                                                   | 3.48 | 15.99  | 24.09 | 13.38        | 51.60               | 24.55         |
| TFA                                                      | 7.10 | 27.43  | 42.78 | 21.69        | 605.30              | 237.82        |

\* DM = dry matter; CP = crude protein; RDP = rumen degradable protein; EE = ether extract; NDF = neutral detergent fiber; ADF = acid detergent fiber; ADL = acid detergent lignin; NSC = nonstructural carbohydrates; NE<sub>L</sub> = net energy for lactation; n.d.=not detected; *c=cis*; *t=trans*; SFA=saturated fatty acids; MUFA=monounsaturated fatty acids; PUFA=polyunsaturated fatty acids; TFA=total fatty acids.

<sup>1</sup> Calculated as 1000 - (NDF + CP + EE + ash).

<sup>2</sup> Coeluted with C14:1
